# Supplementary material
Source: ML conference proceedings conference paper supplement (https://openreview.net/forum?id=2gIMX9UxRN)

$d = 25$ 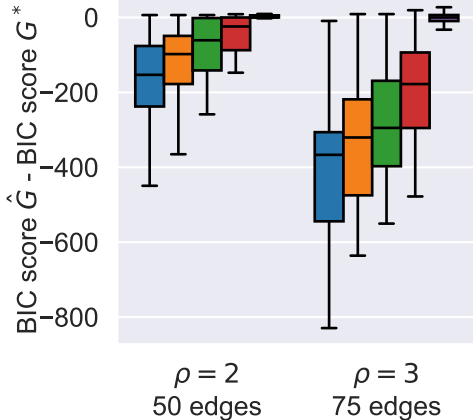 $d = 50$ 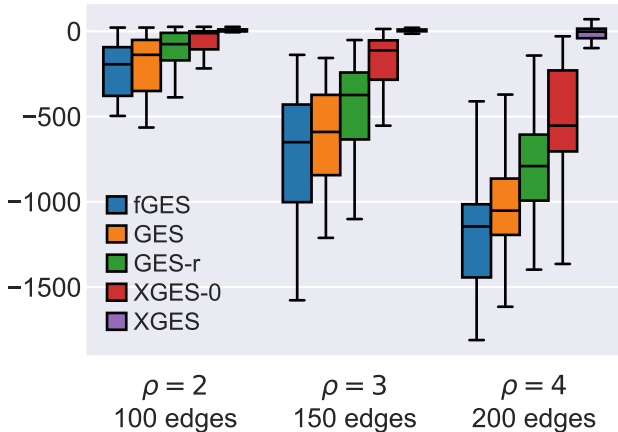

Supplement: supplementary_material [file attachment]

$$d = 15, \rho = 2$$

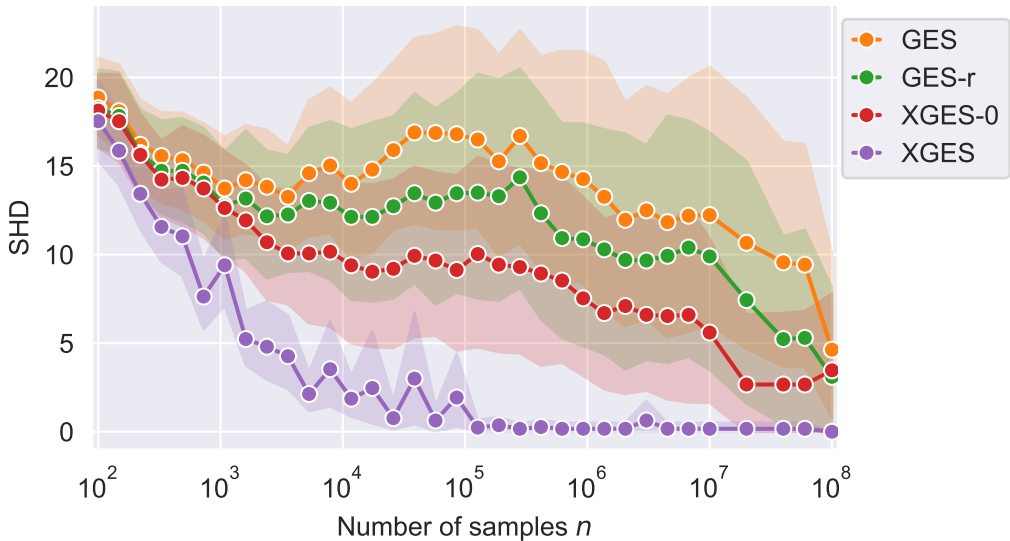

Supplement: supplementary_material [file attachment]

$d = 25$ 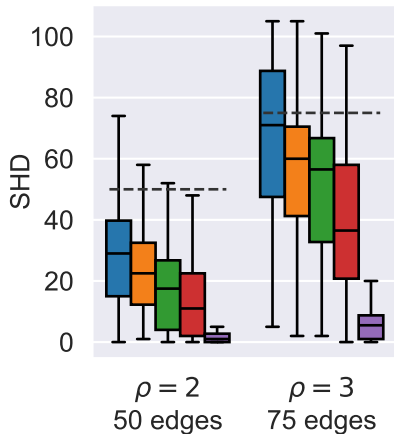 $d = 50$ 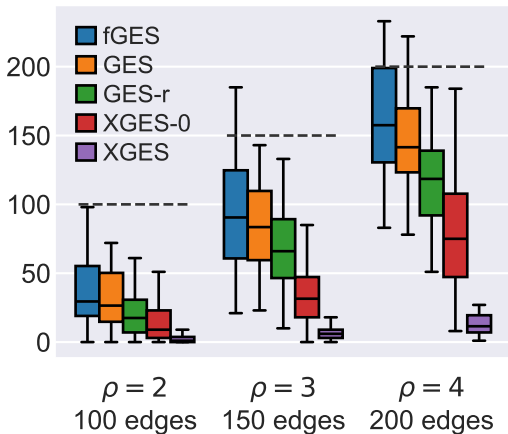

Supplement: supplementary_material [file attachment]

$d = 25$ 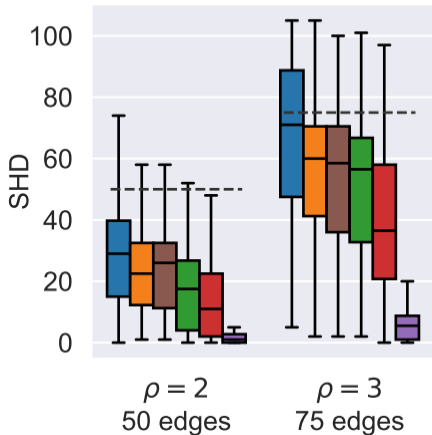 $d = 50$ 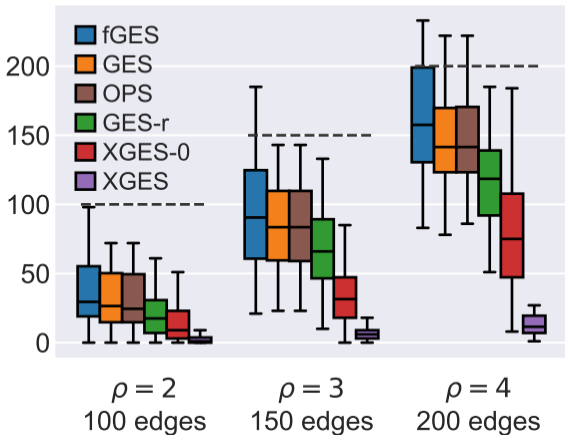

Supplement: supplementary_material [file attachment]

$d = 50, \rho = 3, \alpha = 2$

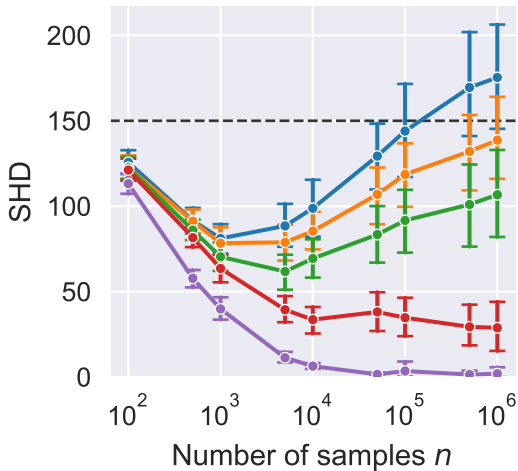

$d = 50, \rho = 3, n = 10000$

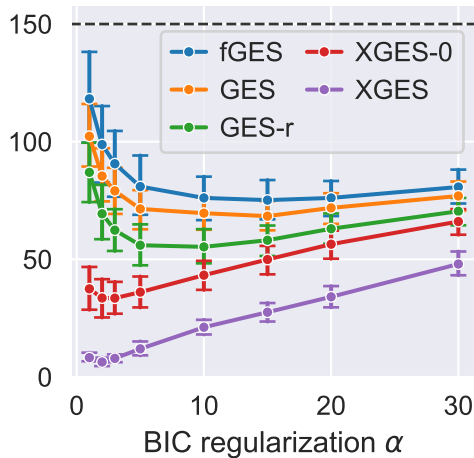

Supplement: supplementary_material [file attachment]

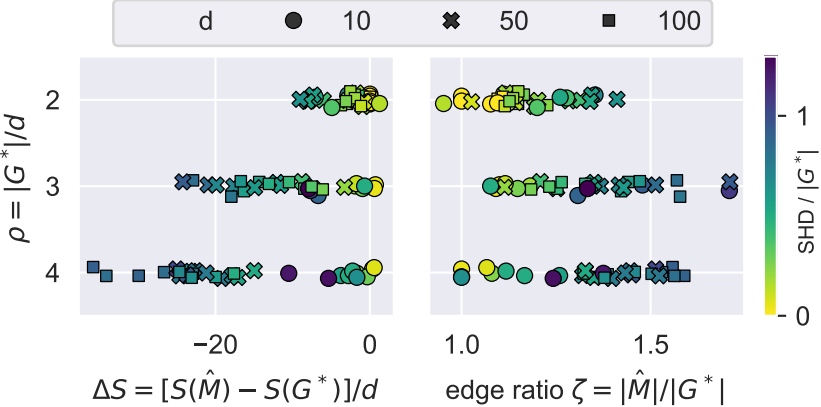

Supplement: supplementary_material [file attachment]

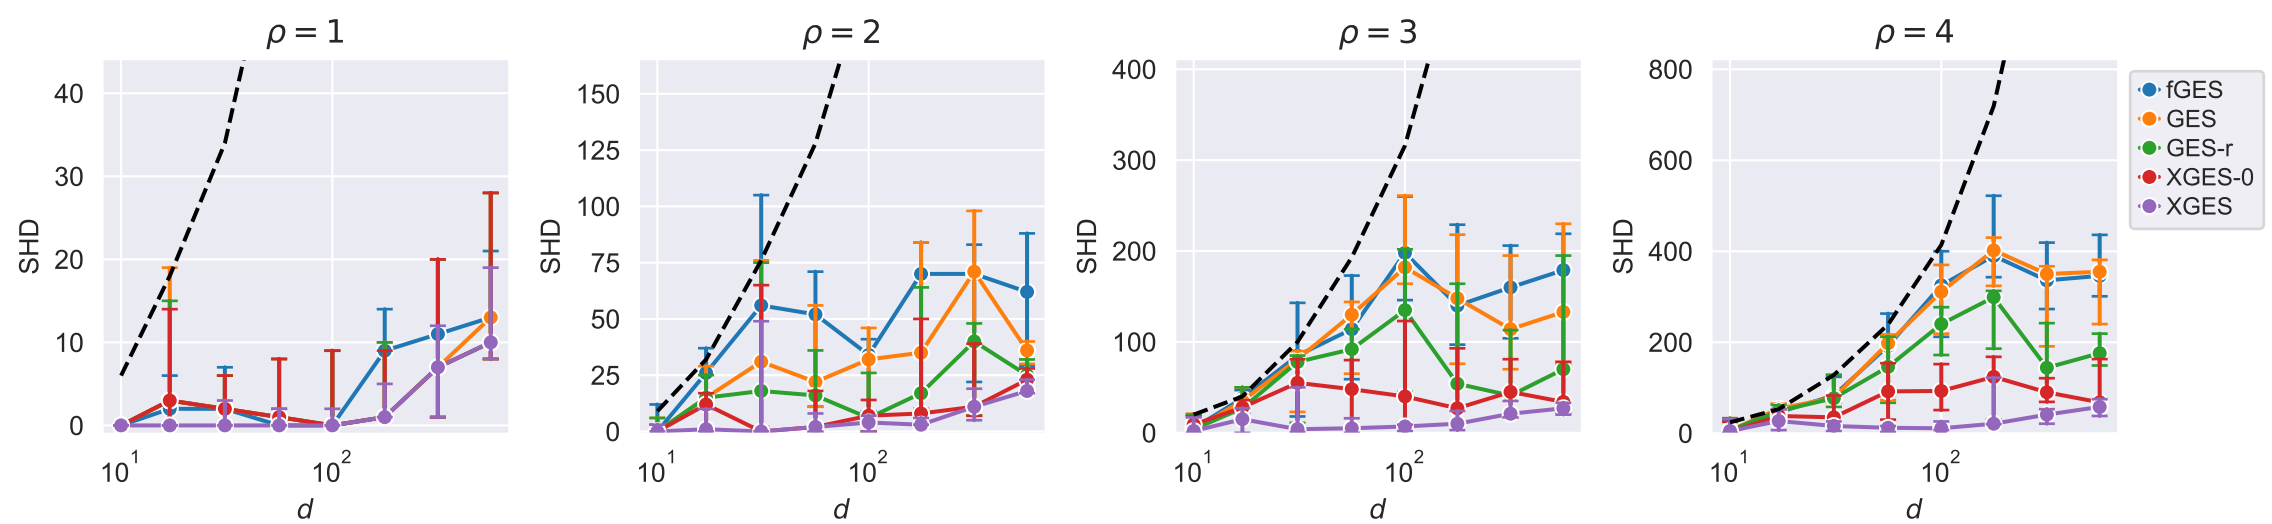

Supplement: supplementary_material [file attachment]

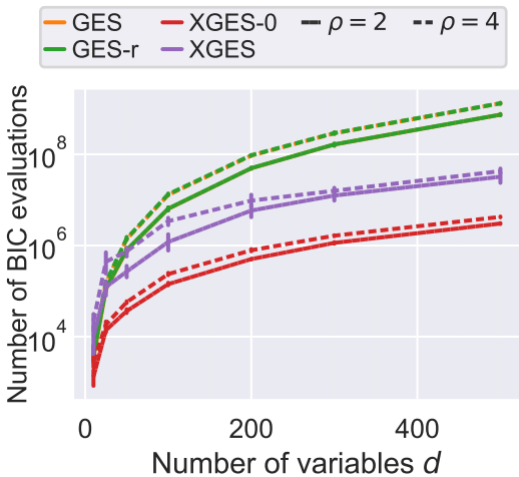

Supplement: supplementary_material [file attachment]

$d = 25$ 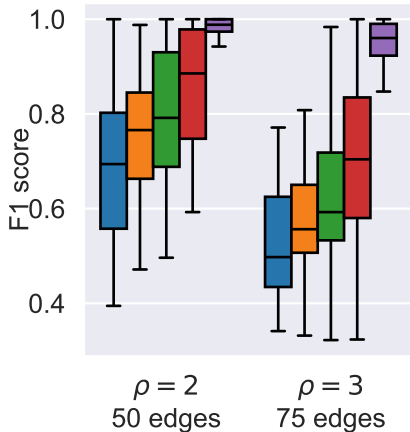 $d = 50$ 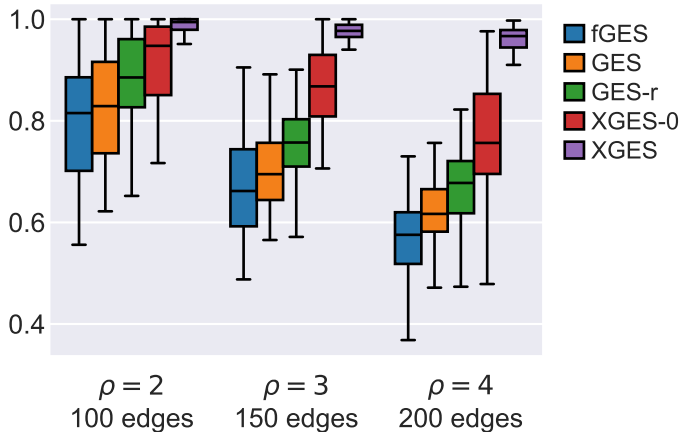

Supplement: supplementary_material [file attachment]

$d = 25$  $d = 50$ 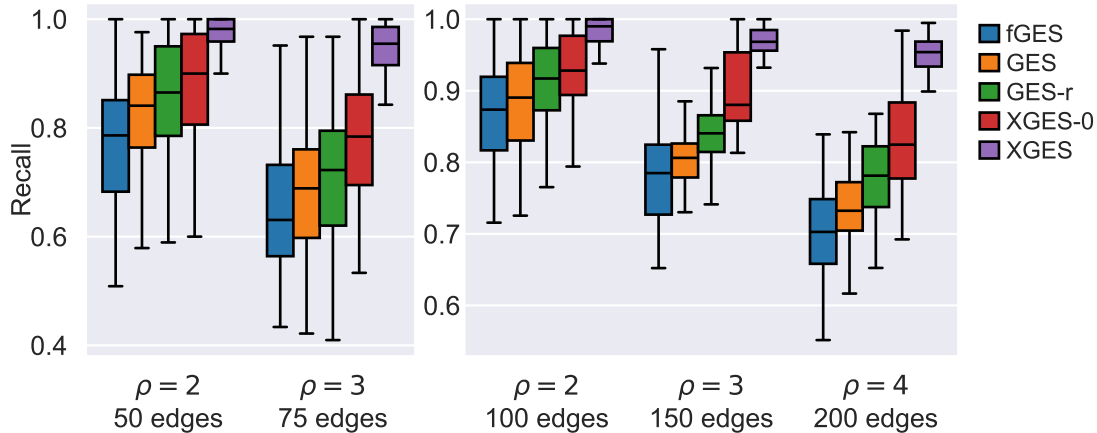

Supplement: supplementary_material [file attachment]

$d = 50, \rho = 3, \alpha = 2$

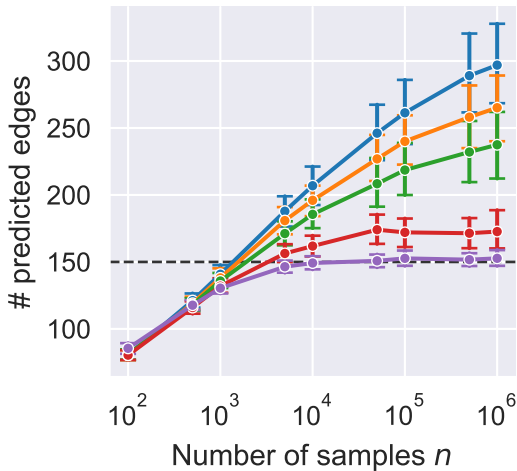

$d = 50, \rho = 3, n = 10000$

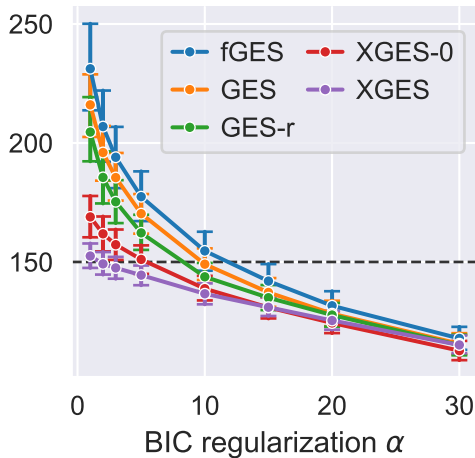

Supplement: supplementary_material [file attachment]

$d = 25$ 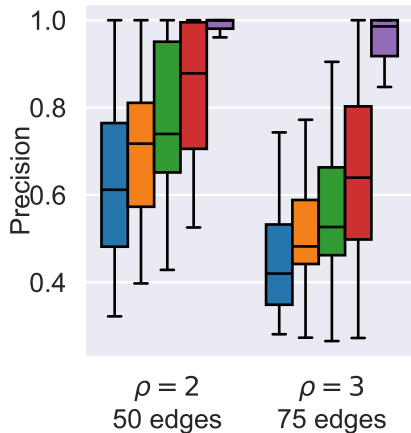 $d = 50$ 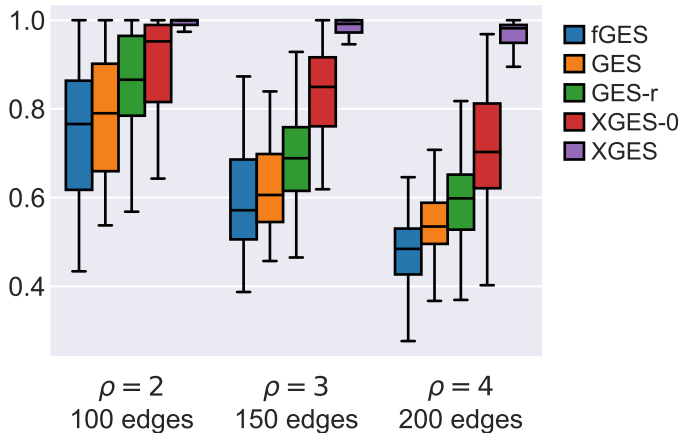

Supplement: supplementary_material [file attachment]

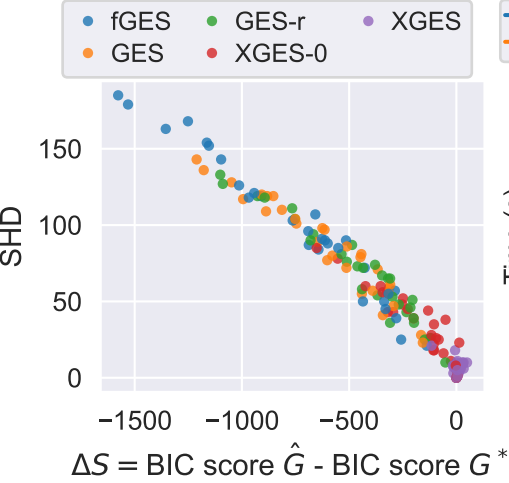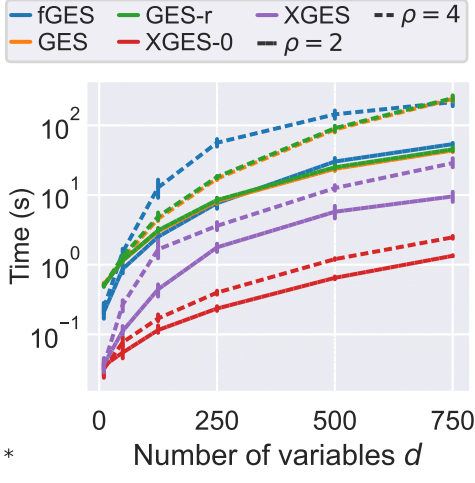

Supplement: supplementary_material [file attachment]
